# Supplementary material
Source: publisher figshare collection journal article supplement (https://future-science-group.figshare.com/ndownloader/files/28456029)
Supplement: Supplementary file 1 [file 28456029]

## Sheet: Sheet1
The scores and related parameters of 10 modules.
Module	Score (Density*#Nodes)	Nodes	Edges
1	10.967	61	329
2	9.935	32	154
3	7.685	90	342
4	7.117	78	274
5	6.778	127	427
6	6.5	17	52
7	6.286	15	44
8	6	23	66
9	5.476	43	115
10	4.933	61	148
